# Supplementary material
Source: PubMed Central journal article supplement (PMC3582736)
Supplement: NIHMS417727-supplement-01.pdf [file NIHMS417727-supplement-01.pdf]

## The Impact of Copy Number Deletions on General Cognitive Ability and Ventricle Size in Patients with Schizophrenia and Healthy Controls

### *Supplemental Information*

**Table S1.** Variables entered into Principal Components Analysis (only one factor extracted), with missing values replaced by group means. The principal component captured = 34.11% of test variance.

| Test                                                                 | Factor Loadings |
|----------------------------------------------------------------------|-----------------|
| Wide Range Achievement Test III: Total Reading                       | .47             |
| Verbal Fluency: Animals                                              | .38             |
| Verbal Fluency: Fruits                                               | .32             |
| Wechsler Adult Intelligence Scale III: Block Design Total Raw Score  | .64             |
| Wechsler Adult Intelligence Scale III: Letter-Number Total Raw Score | .52             |
| Wechsler Adult Intelligence Scale III: Vocabulary Total Raw Score    | .47             |
| Wechsler Adult Intelligence Scale III: Similarities Total Raw Score  | .44             |
| Grooved Pegboard: Dominant hand time                                 | .45             |
| Grooved Pegboard: Dominant hand number of drops                      | .10             |
| Grooved Pegboard: Non-dominant hand time                             | .47             |
| Grooved Pegboard: Non-dominant hand number of drops                  | .16             |
| Trails Making Test A: Time                                           | .38             |
| Trails Making Test A: Errors                                         | .05             |
| Trails Making Test B: Time                                           | .57             |
| Trails Making Test B: Errors                                         | .22             |
| CRT CalCap SEQ1: True Positives                                      | .33             |
| CRT CalCap SEQ1: False Positives                                     | .30             |
| CRT CalCap SEQ2: True Positives                                      | .25             |
| CRT CalCap SEQ2: False Positives                                     | .11             |
| Tower of London Excess Moves: 3 Ring                                 | .16             |
| Tower of London Excess Moves: 4 Ring                                 | .35             |
| Tower of London Excess Moves: 5 Ring                                 | .33             |
| Tower of London Total Trials Time: 3 Ring                            | .33             |
| Tower of London Total Trials Time: 4 Ring                            | .29             |
| Tower of London Total Trials Time: 5 Ring                            | .45             |

CalCap, California Computerized Assessment Package; CRT, Choice Reaction Time.
